# Supplementary figures and images for: P-REX1-Independent, Calcium-Dependent RAC1 Hyperactivation in Prostate Cancer
Source: MDPI journal article supplement (doi:10.3390/cancers12020480), 2020-02-19

Full blots from Figure S1A-C

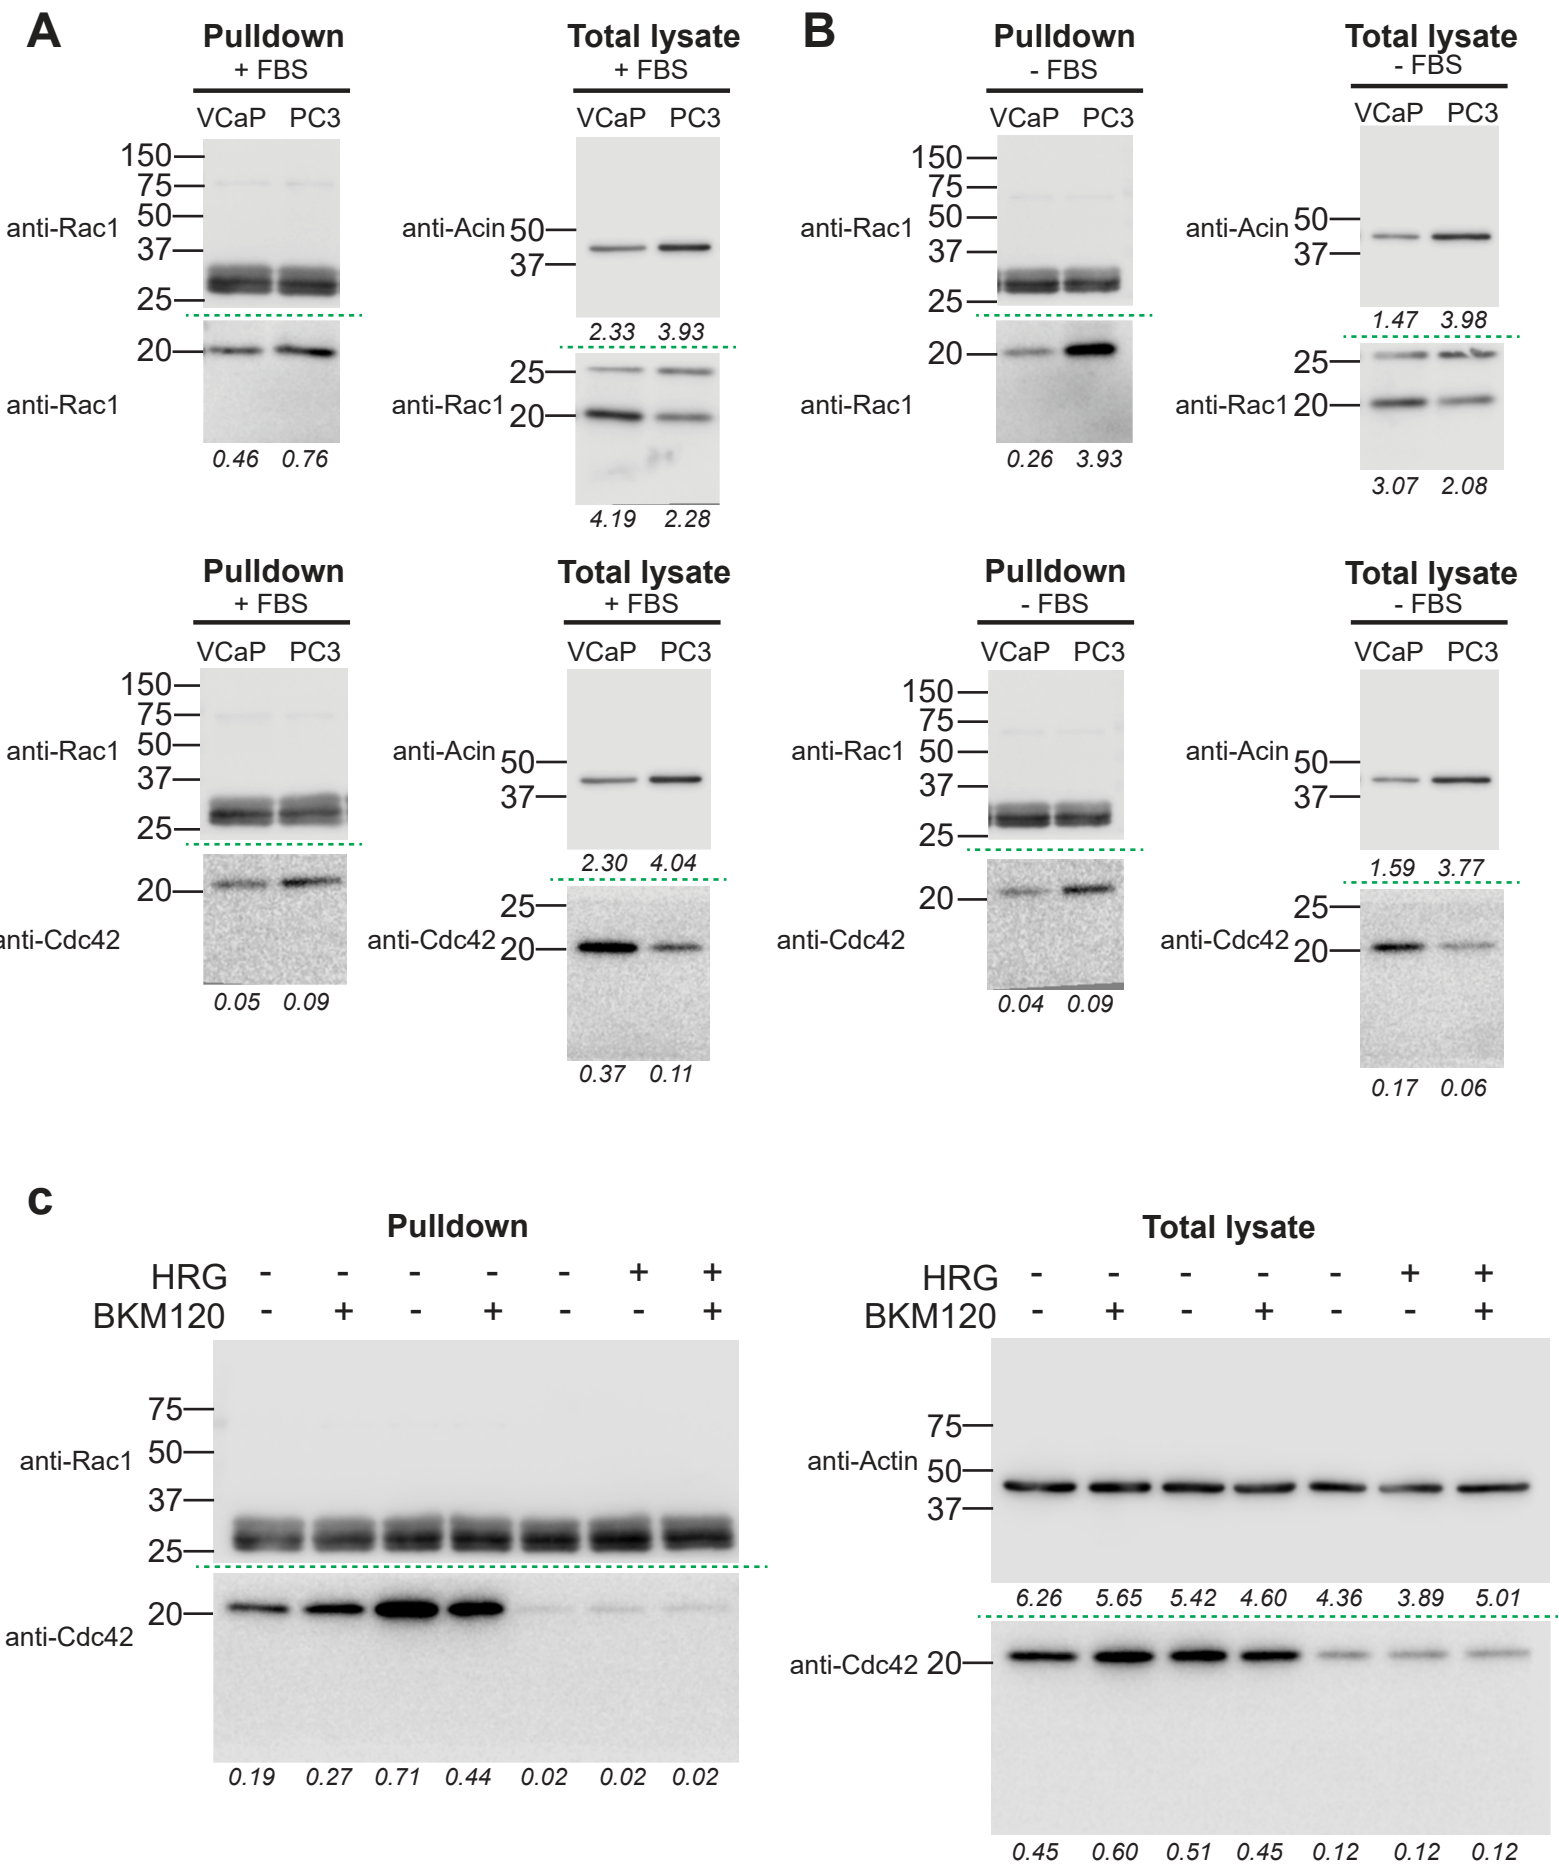

\* Green line, membrane was cut to blot with different antibodies.

Supplement: s1 [file s1]

# Full blots from Figure S4B

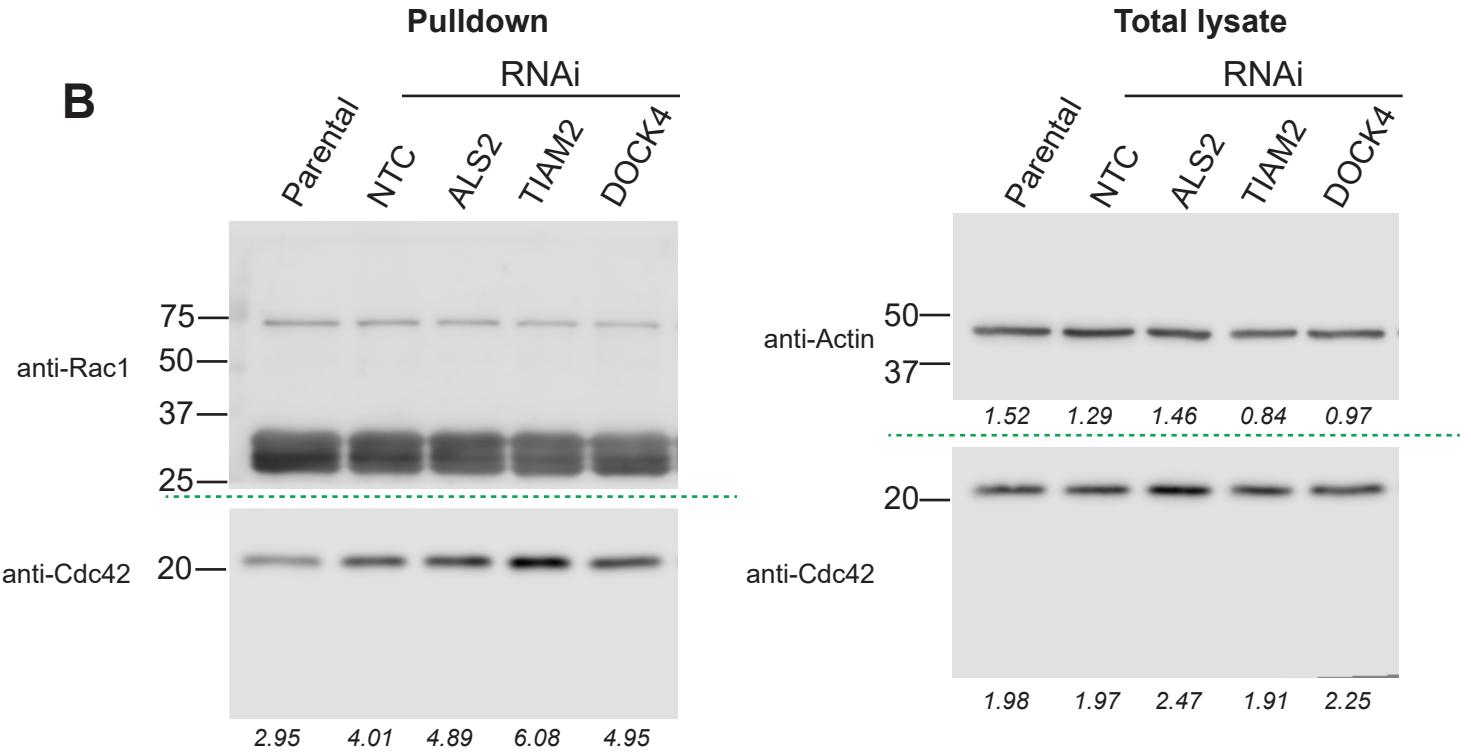

\* Green line, membrane was cut to blot with different antibodies.

Supplement: s1 [file s1]

Full blots from Figure S2

A

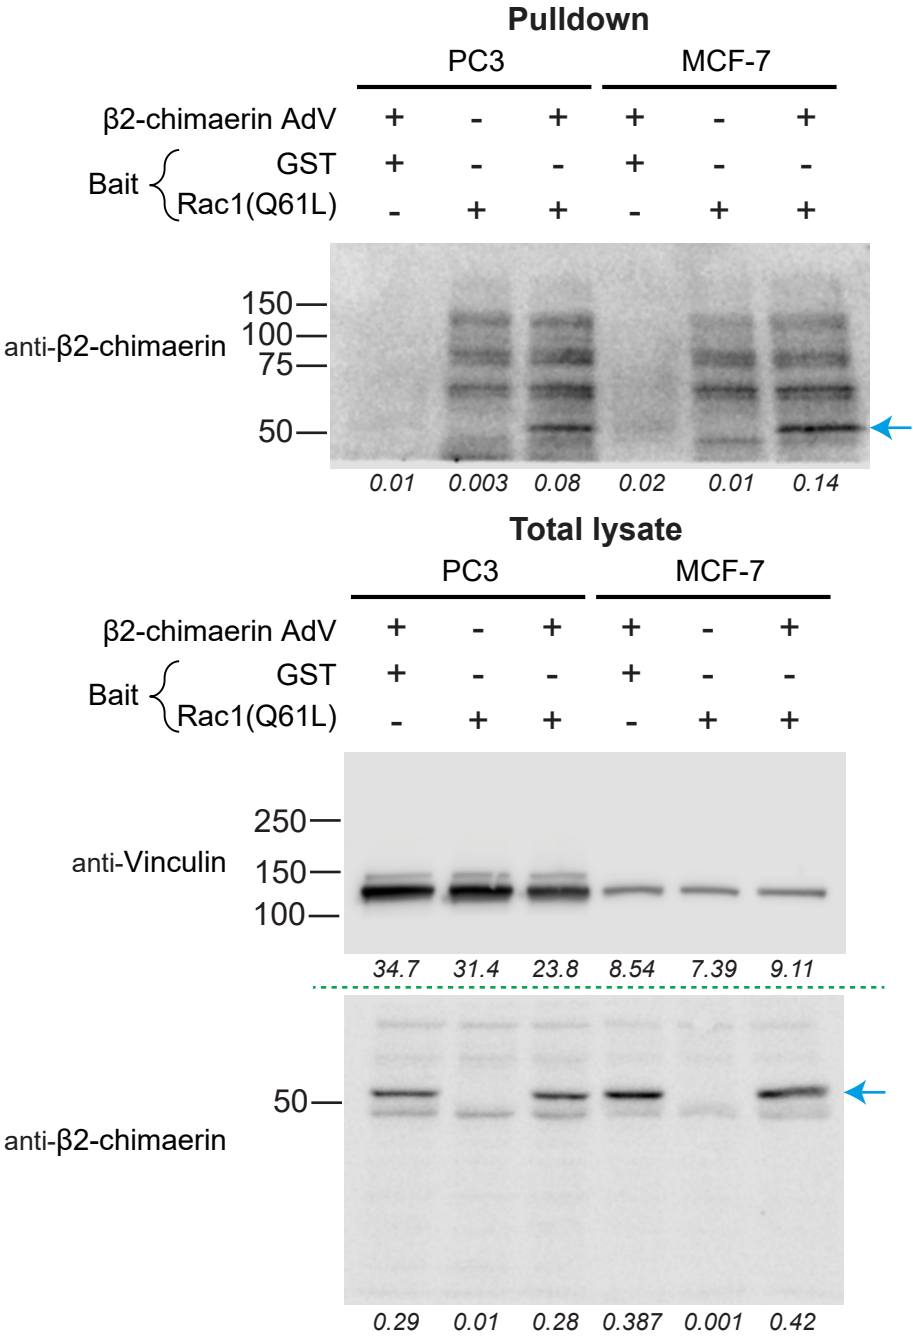

B

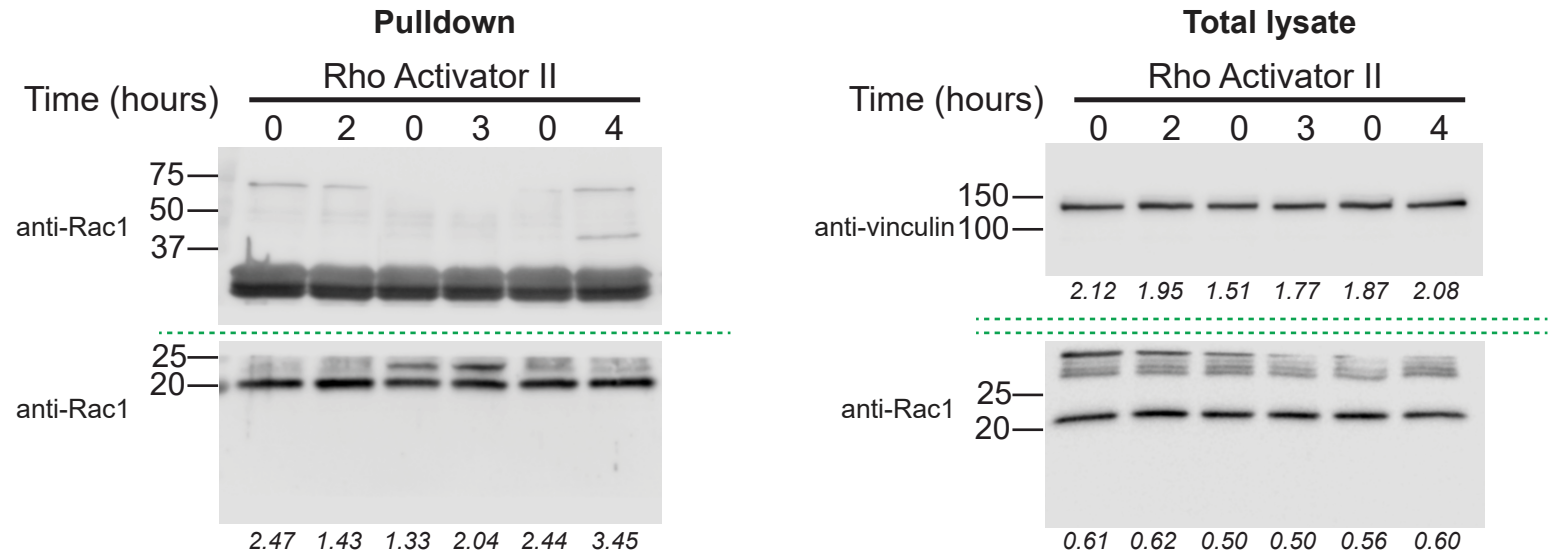

\* Green line, membrane was cut to blot with different antibodies.

Supplement: s1 [file s1]

# Full blots from Figure S5

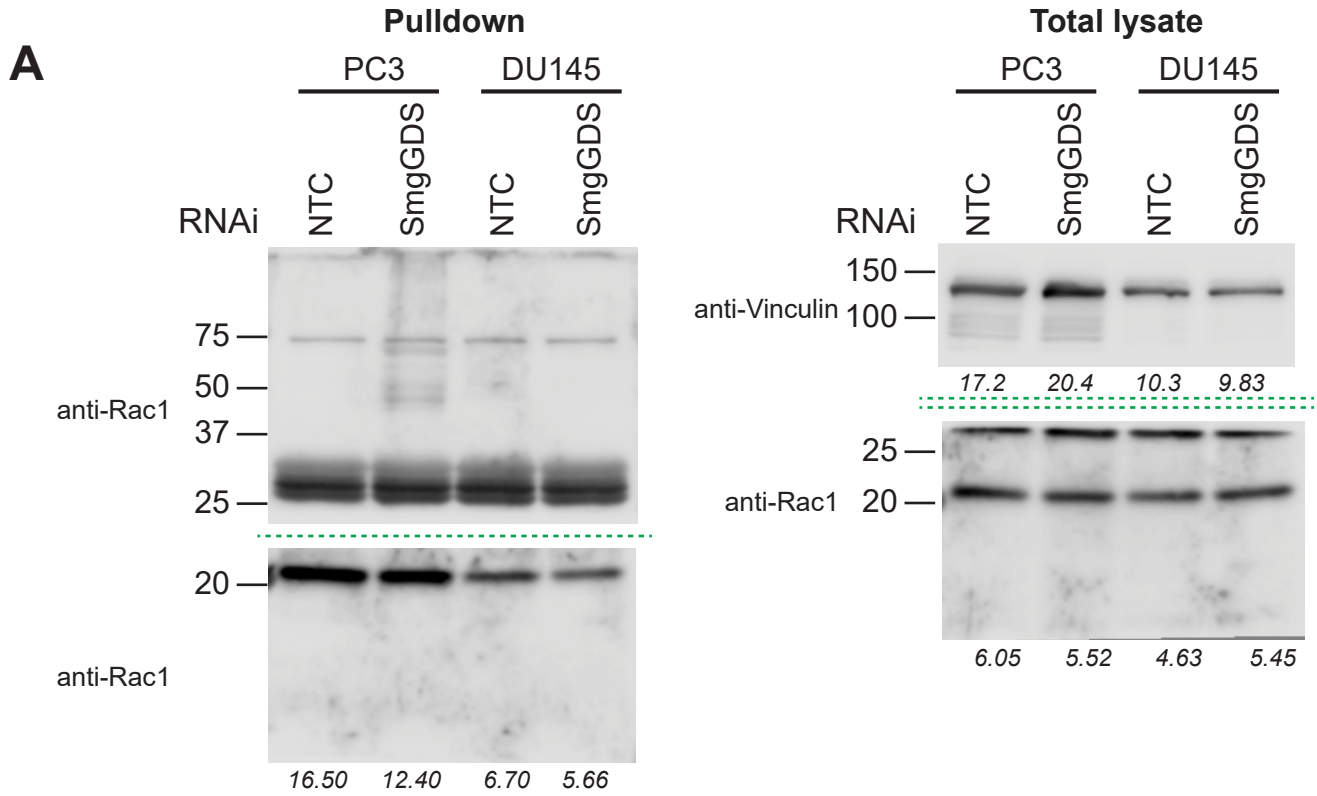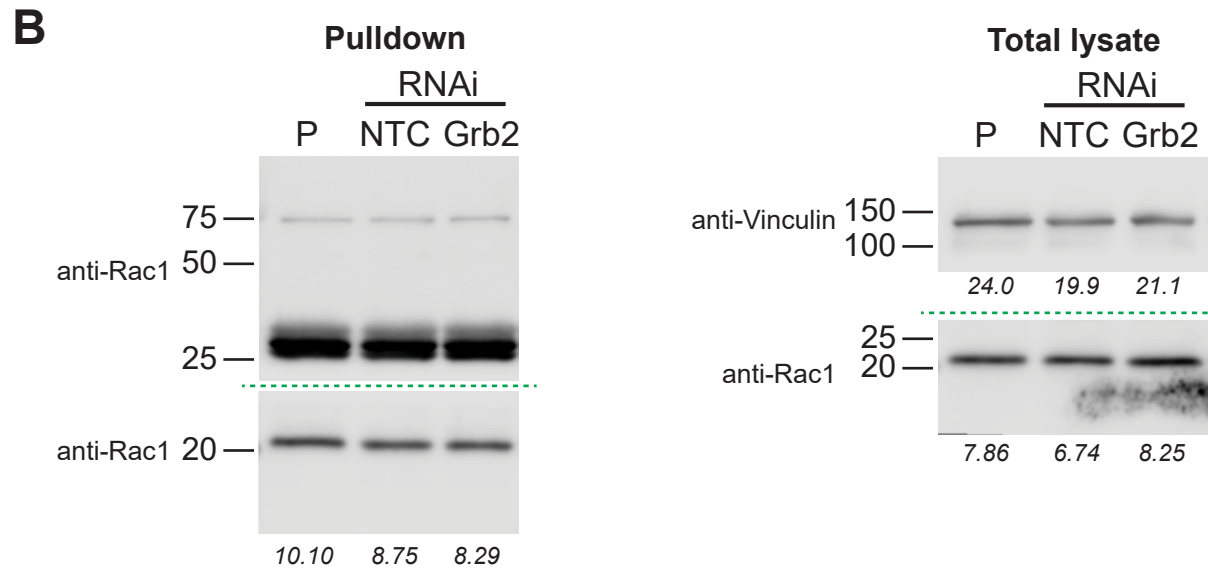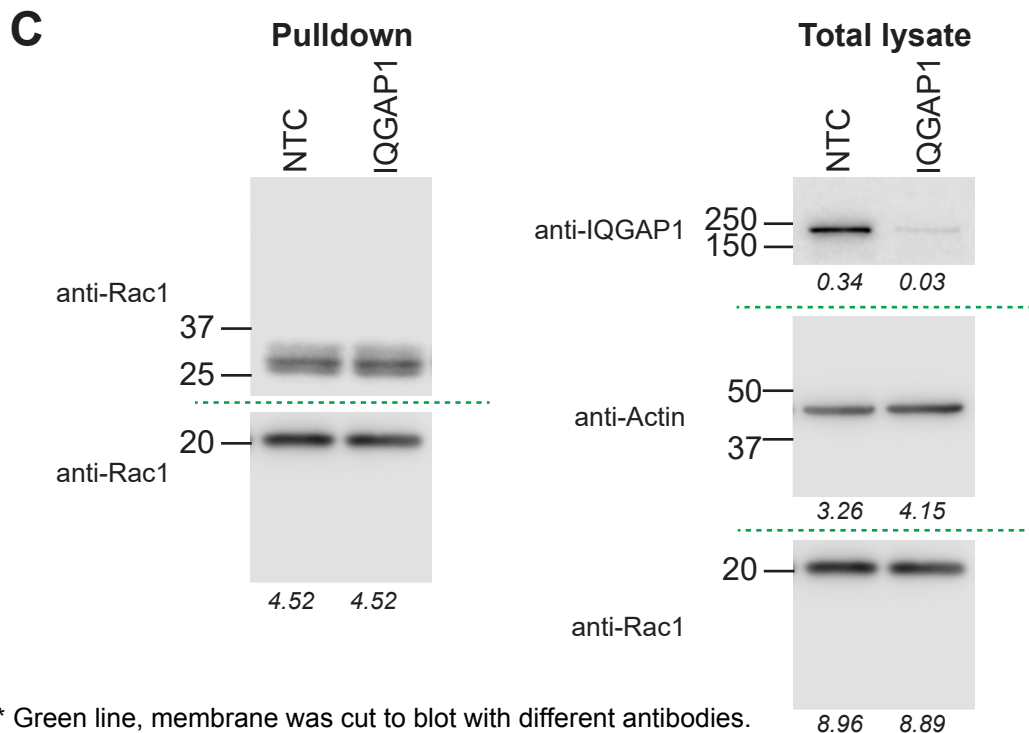

\* Green line, membrane was cut to blot with different antibodies.

Supplement: s1 [file s1]

# Full blots from Figure S1D-E

D

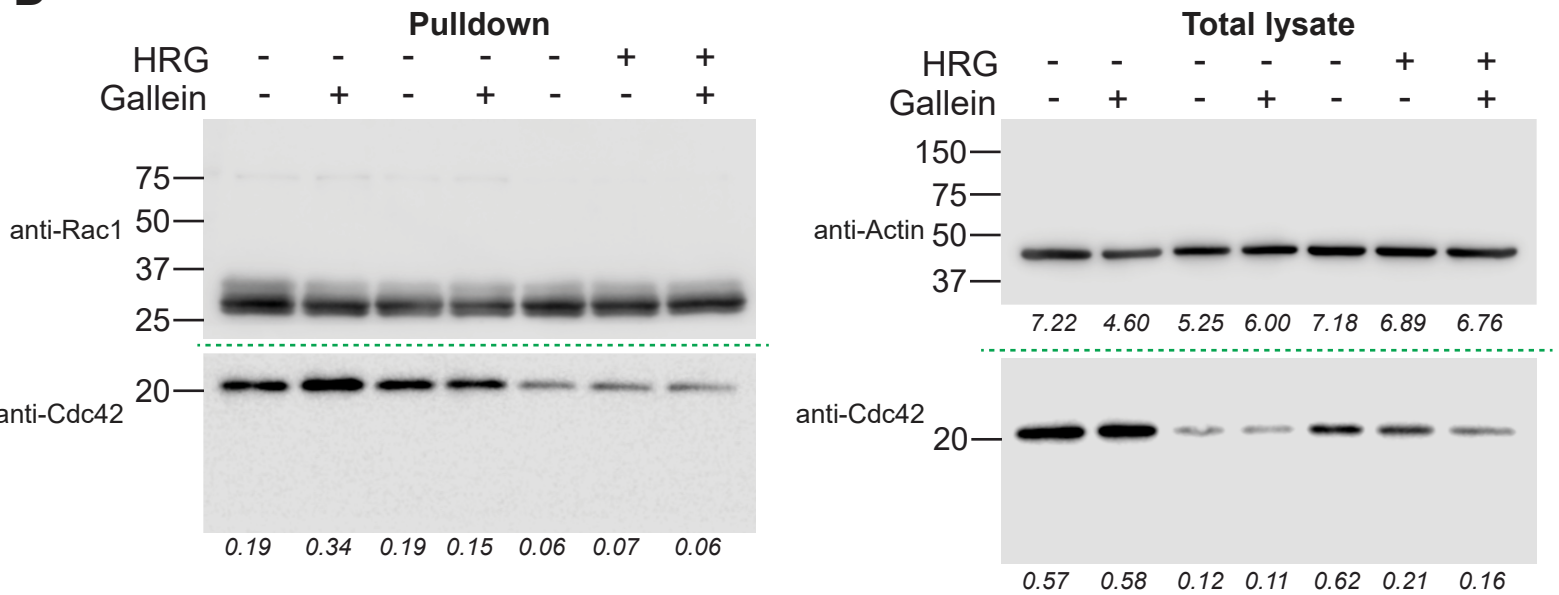

E

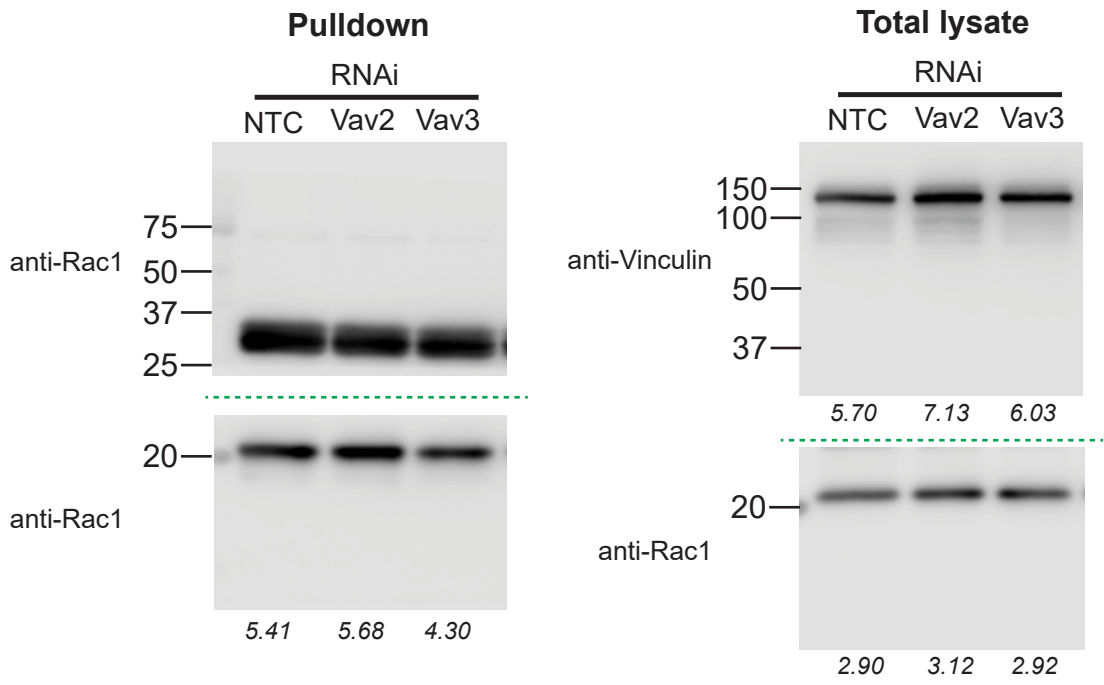

\* Green line, membrane was cut to blot with different antibodies.

Supplement: s1 [file s1]
